# Supplementary material for: Normalized skin conductance level could differentiate physical pain stimuli from other sympathetic stimuli
Source: PubMed Central journal article supplement (PMC7331661; doi:10.1038/s41598-020-67936-0), 2020-07-02
Supplement: 41598_2020_67936_MOESM1_ESM.pdf [file 41598_2020_67936_MOESM1_ESM.pdf]

## Supplementary information

### **Normalized skin conductance level could differentiate physical pain stimuli from other sympathetic stimuli**

Satomi Sugimine<sup>1</sup>, Shigeru Saito<sup>1,2</sup>, and Tomonori Takazawa<sup>1</sup>

<sup>1</sup> Intensive Care Unit, Gunma University Hospital, 3-39-15 Showa-machi, Maebashi, Gunma 371-8511, Japan

<sup>2</sup> Department of Anesthesiology, Gunma University Graduate School of Medicine, 3-39-22 Showa-machi, Maebashi, Gunma 371-8511, Japan

#### **Corresponding author**

Tomonori Takazawa, MD, PhD

Mailing address: 3-39-15, Showa-machi, Maebashi, Gunma 371-8511, Japan

Tel: +81-27-220-8698; Fax: +81-27-220-8692

E-mail: [takazawt@gunma-u.ac.jp](mailto:takazawt@gunma-u.ac.jp)

Table S1. Correlation coefficients between numerical pain scale (NPS) scores and skin conductance values

|      |                   | NPS                    |                        |                       |                       |                        |                        |
|------|-------------------|------------------------|------------------------|-----------------------|-----------------------|------------------------|------------------------|
|      |                   | Control<br>(32°C)      | 46°C                   | 47°C                  | 48°C                  | Mech                   | Cold                   |
| nSCL | Control<br>(32°C) | r = 0.003<br>p = 0.97  |                        |                       |                       |                        |                        |
|      | 46°C              |                        | r = -0.030<br>p = 0.73 |                       |                       |                        |                        |
|      | 47°C              |                        |                        | r = 0.14<br>p = 0.11  |                       |                        |                        |
|      | 48°C              |                        |                        |                       | r = 0.076<br>p = 0.54 |                        |                        |
|      | Mech              |                        |                        |                       |                       | r = 0.28<br>p < 0.001  |                        |
|      | Cold              |                        |                        |                       |                       |                        | r = -0.05<br>p = 0.58  |
| NFSC | Control<br>(32°C) | r = -0.071<br>p = 0.41 |                        |                       |                       |                        |                        |
|      | 46°C              |                        | r = -0.029<br>p = 0.74 |                       |                       |                        |                        |
|      | 47°C              |                        |                        | r = 0.025<br>p = 0.77 |                       |                        |                        |
|      | 48°C              |                        |                        |                       | r = -0.13<br>p = 0.29 |                        |                        |
|      | Mech              |                        |                        |                       |                       | r = -0.066<br>p = 0.44 |                        |
|      | Cold              |                        |                        |                       |                       |                        | r = -0.051<br>p = 0.55 |

Although there was a weak correlation between NPS and normalized skin conductance level (nSCL) for the mechanical stimulus, there was no correlation for the other stimuli. Mech: mechanical.
